# Supplementary material for: PTP1B Inhibitory and Anti-Inflammatory Effects of Secondary Metabolites Isolated from the Marine-Derived Fungus Penicillium sp. JF-55
Source: MDPI journal article supplement (doi:10.3390/md11041409), 2013-04-23

# Supplementary Information

## Table of Contents

**Figure S1.** The effects of compounds on cell viability in murine peritoneal macrophages.

**Figure S2.** The effects of penstyrylpyrone (**1**) on IL-1 $\beta$  and TNF- $\alpha$  production in murine peritoneal macrophages stimulated with LPS.

**Figure S3.**  $^1\text{H}$  NMR spectrum of penistyrylpyrone (**1**) in DMSO- $d_6$ .

**Figure S4.**  $^{13}\text{C}$  NMR spectrum of penistyrylpyrone (**1**) in DMSO- $d_6$ .

**Figure S5.** HSQC data of penistyrylpyrone (**1**) in DMSO- $d_6$ .

**Figure S6.** HMBC data of penistyrylpyrone (**1**) in DMSO- $d_6$ .

**Figure S7.**  $^1\text{H}$  NMR spectrum of anhydrofulvic acid (**2**) in DMSO- $d_6$ .

**Figure S8.**  $^{13}\text{C}$  NMR spectrum of anhydrofulvic acid (**2**) in DMSO- $d_6$ .

**Figure S9.**  $^1\text{H}$  NMR spectrum of citromycetin (**3**) in DMSO- $d_6$ .

**Figure S10.**  $^{13}\text{C}$  NMR spectrum of citromycetin (**3**) in DMSO- $d_6$ .

**Figure S1.** The effects of compounds on cell viability in murine peritoneal macrophages. Murine peritoneal macrophages were incubated for 48 h with various concentrations of each compound (1–50  $\mu\text{M}$ ). Cell viability was determined. The data represent the mean values  $\pm$  SD of 3 experiments.

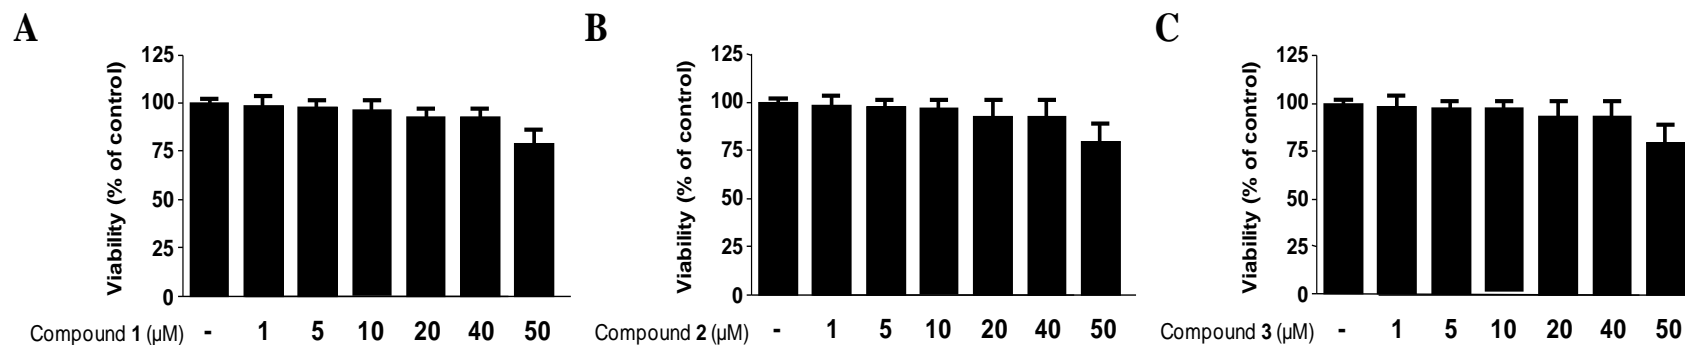

**Figure S2.** The effects of penstyrylpyrone (**1**) on IL-1 $\beta$  (**A**) and TNF- $\alpha$  (**B**) production in murine peritoneal macrophages stimulated with LPS. Murine peritoneal macrophages were pre-treated for 12 h at the indicated concentrations of penstyrylpyrone (**1**) and stimulated for 18 h with LPS (1  $\mu\text{g}/\text{mL}$ ). The concentrations of IL-1 $\beta$  (**A**) and TNF- $\alpha$  (**B**) were determined. The data represent the mean values  $\pm$  SD of 3 experiments. \*  $p < 0.05$  compared with the group treated with LPS.

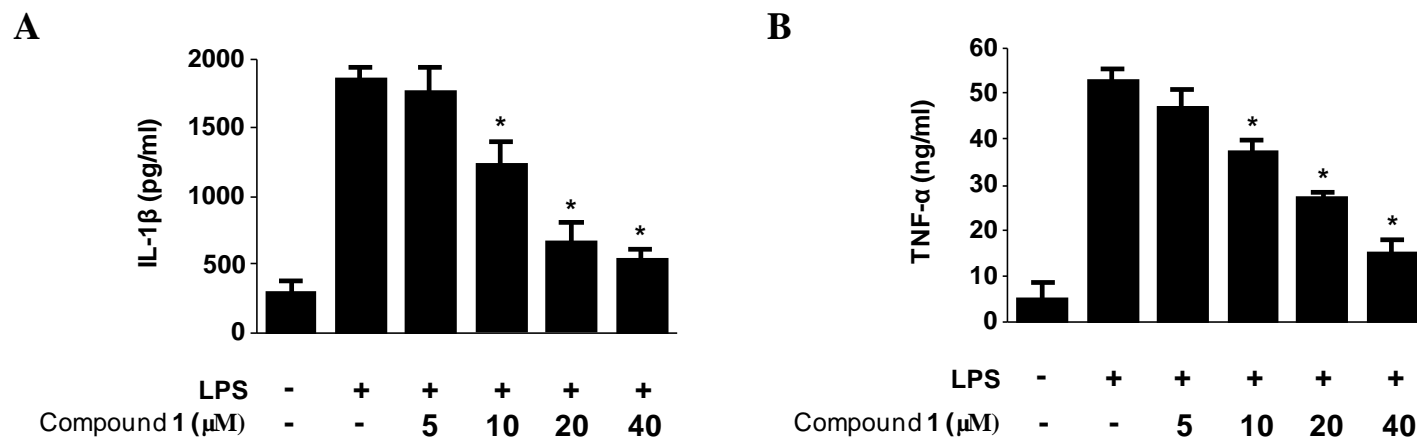

Figure S3.  $^1\text{H}$  NMR spectrum of penistyrylpyrone (1) in  $\text{DMSO-}d_6$ .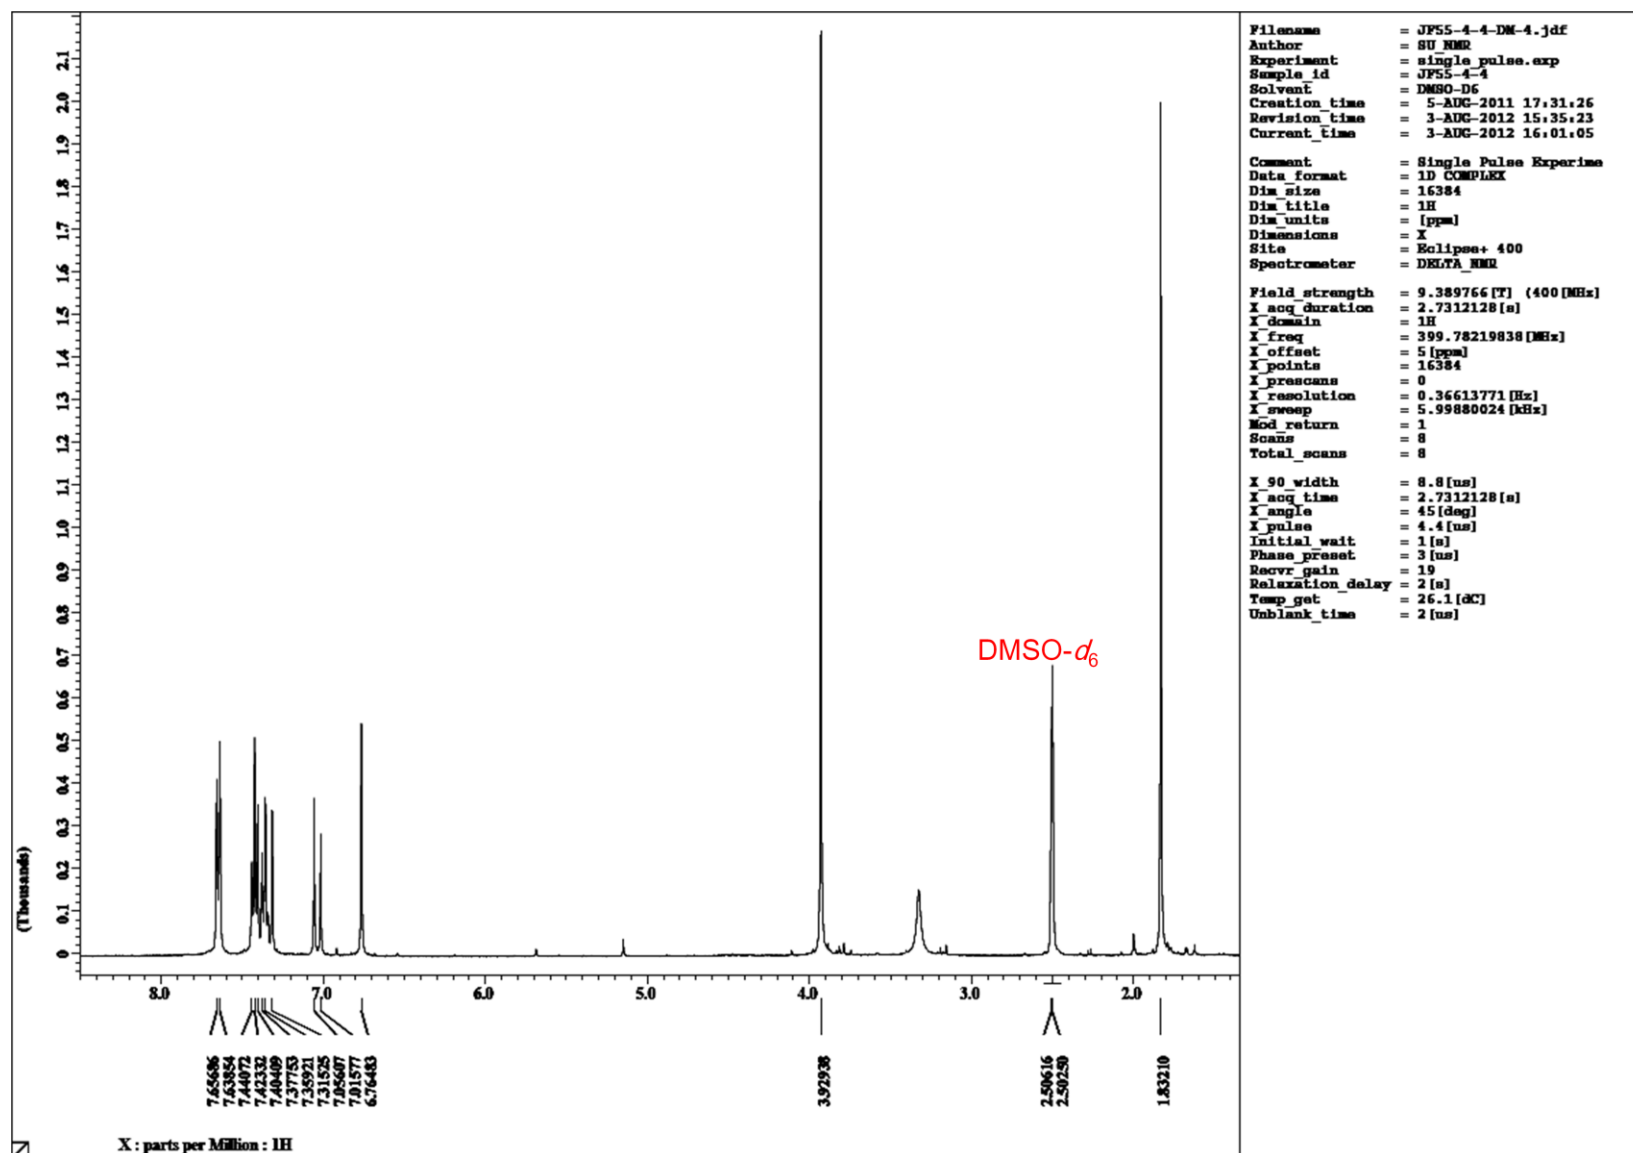

Figure S4.  $^{13}\text{C}$  NMR spectrum of penistyrylpyrone (1) in  $\text{DMSO}-d_6$ .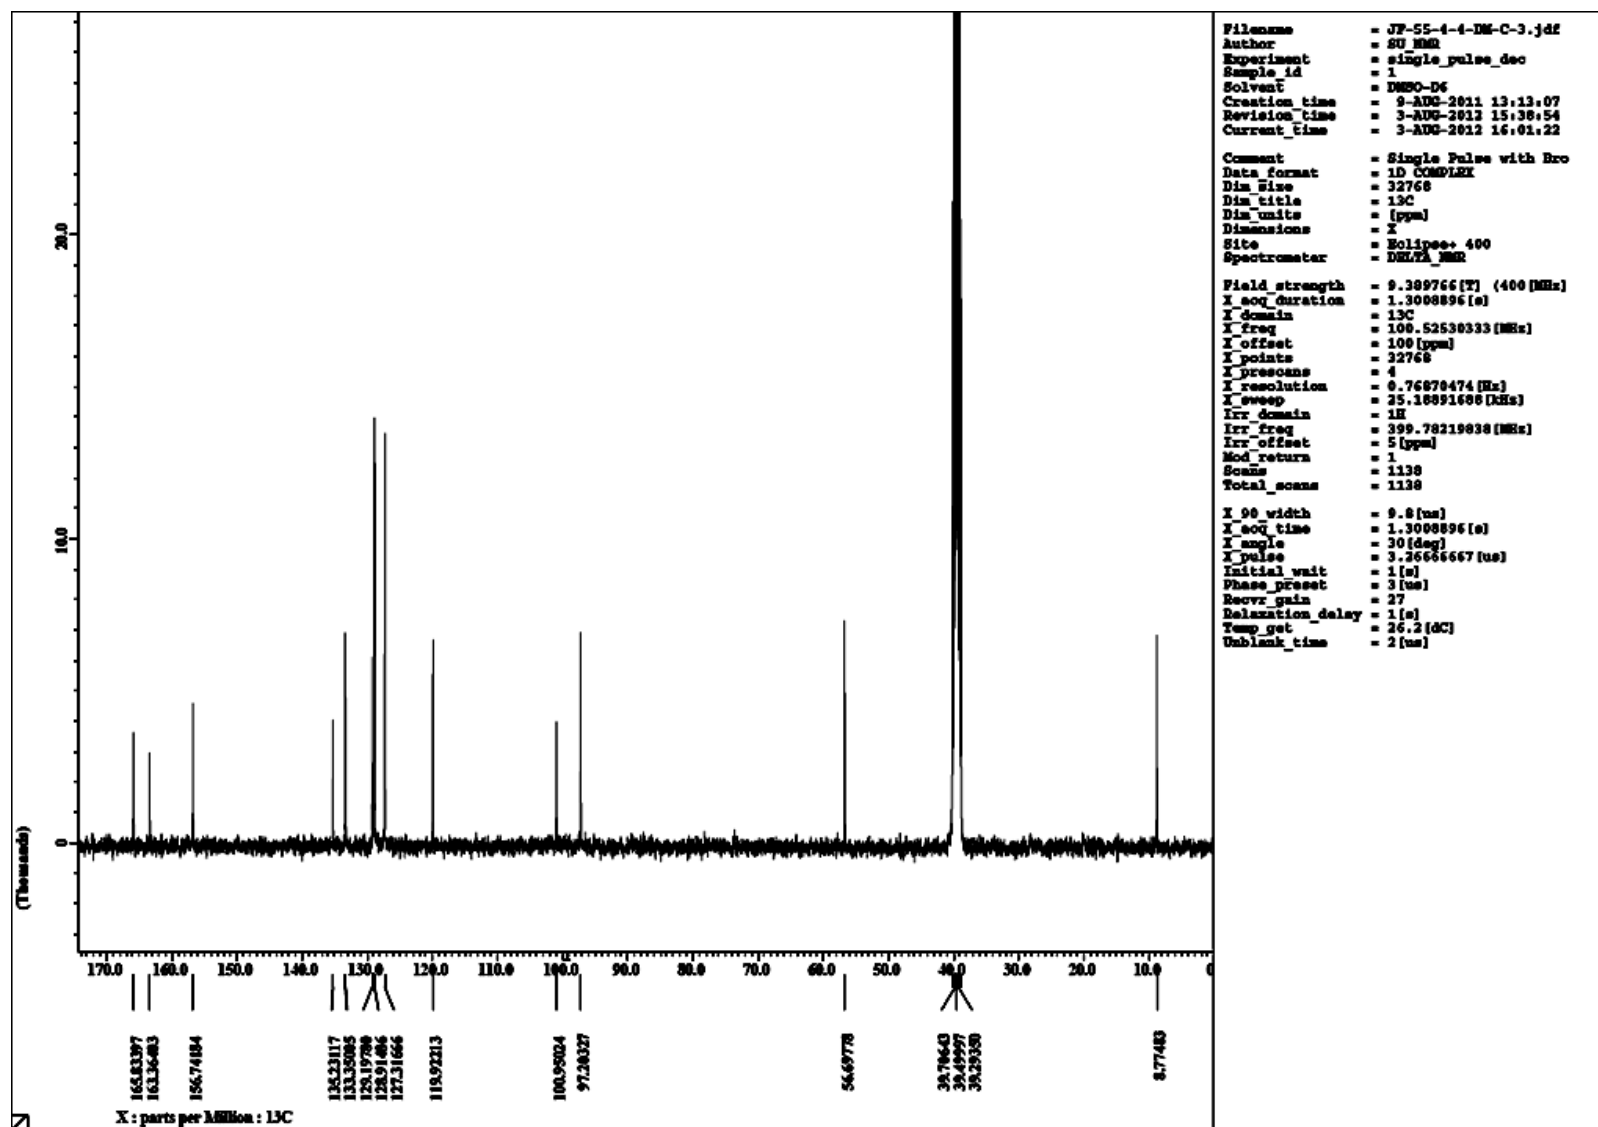

Figure S5. HSQC data of penistyrylpyrone (1) in DMSO-*d*<sub>6</sub>.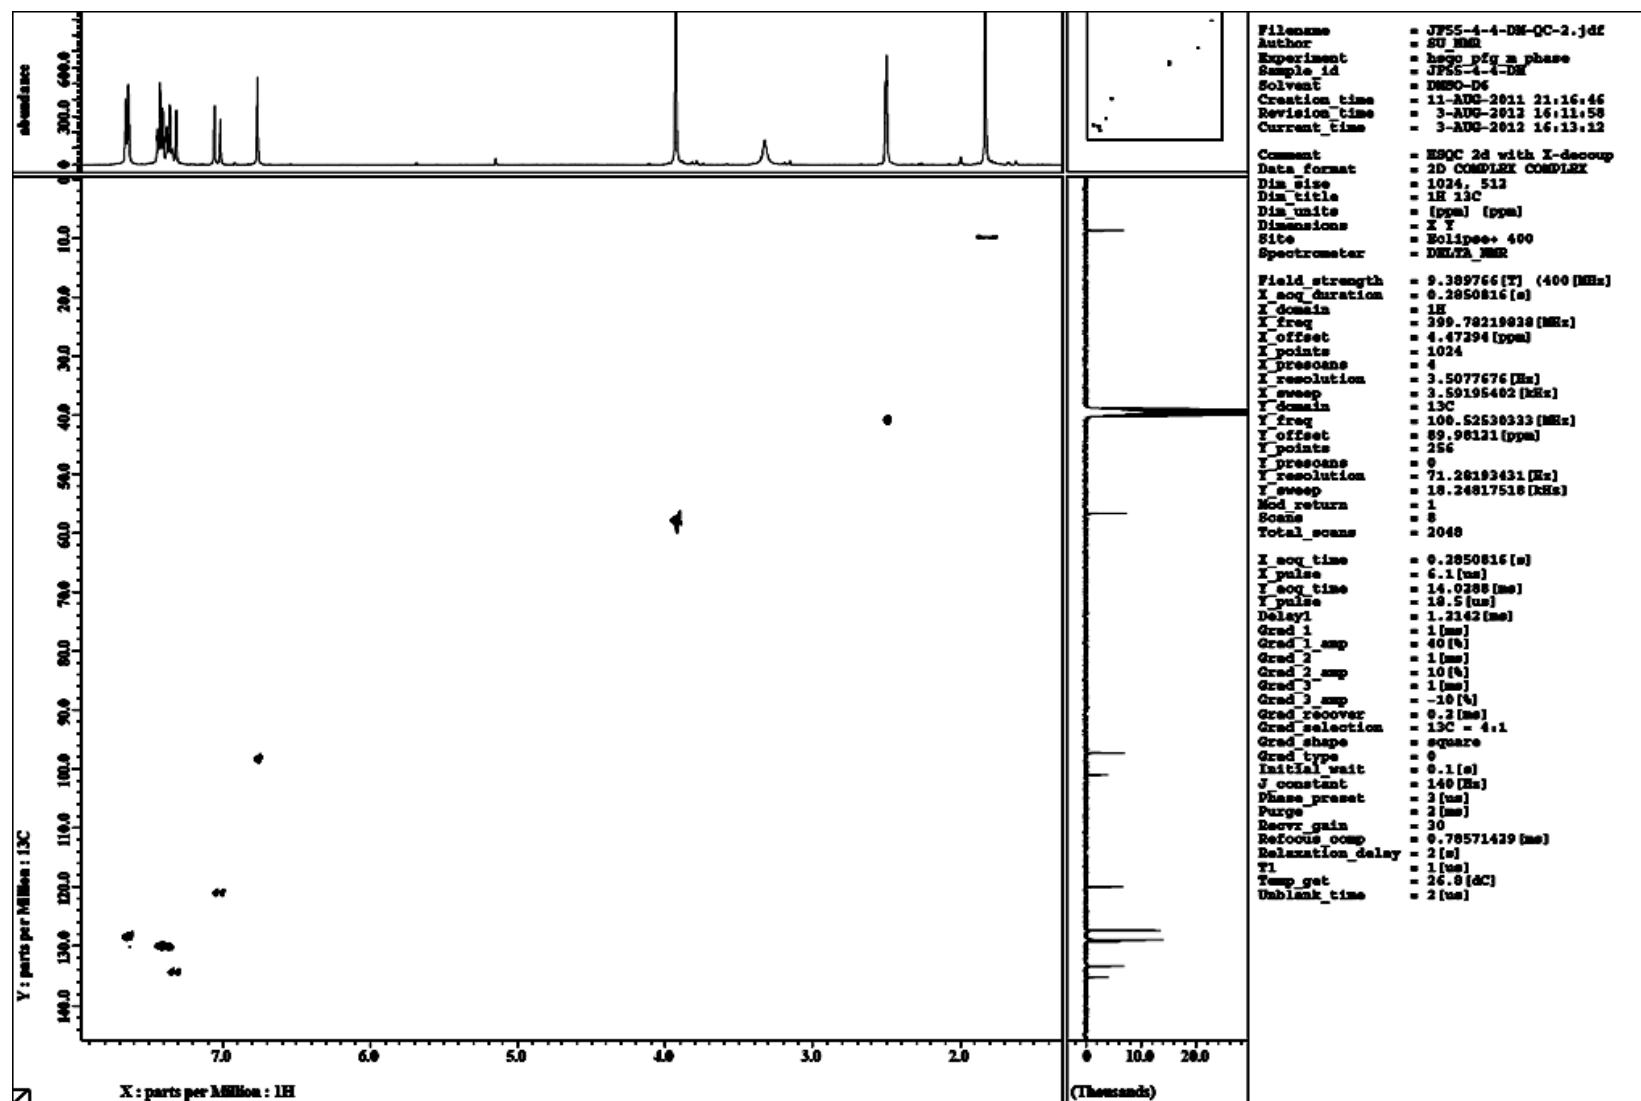

Figure S6. HMBC data of penistrylpyrone (1) in DMSO- $d_6$ .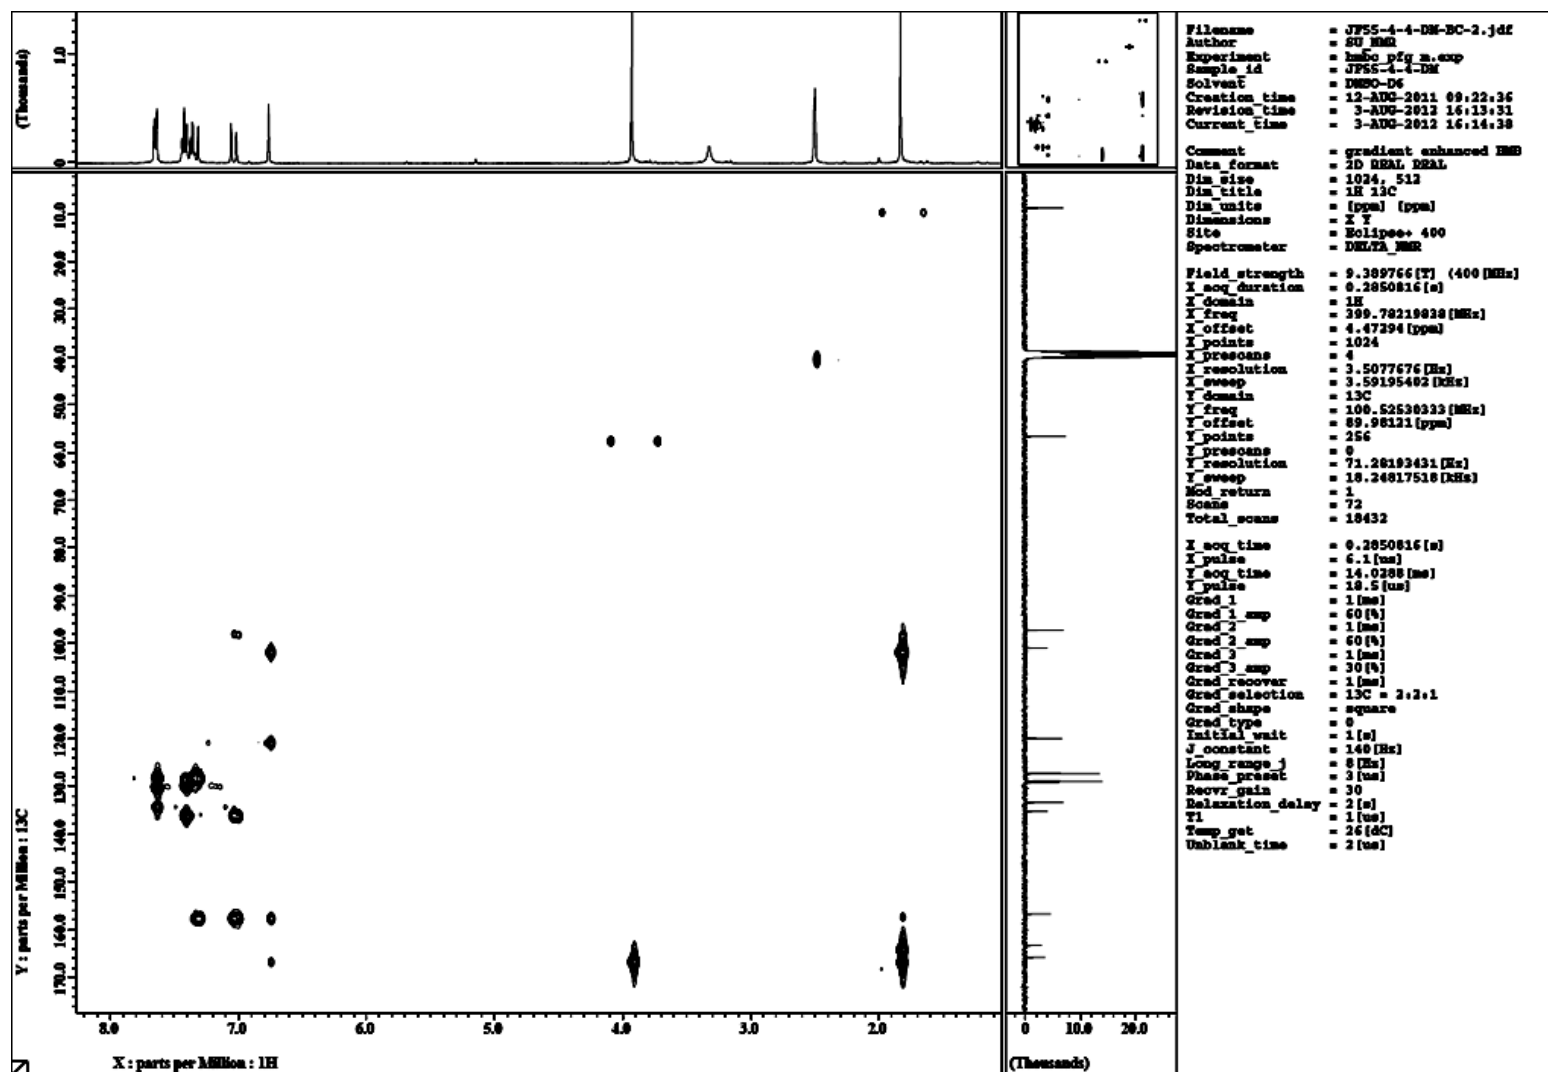

Figure S7.  $^1\text{H}$  NMR spectrum of anhydrofulvic acid (2) in  $\text{DMSO-}d_6$ .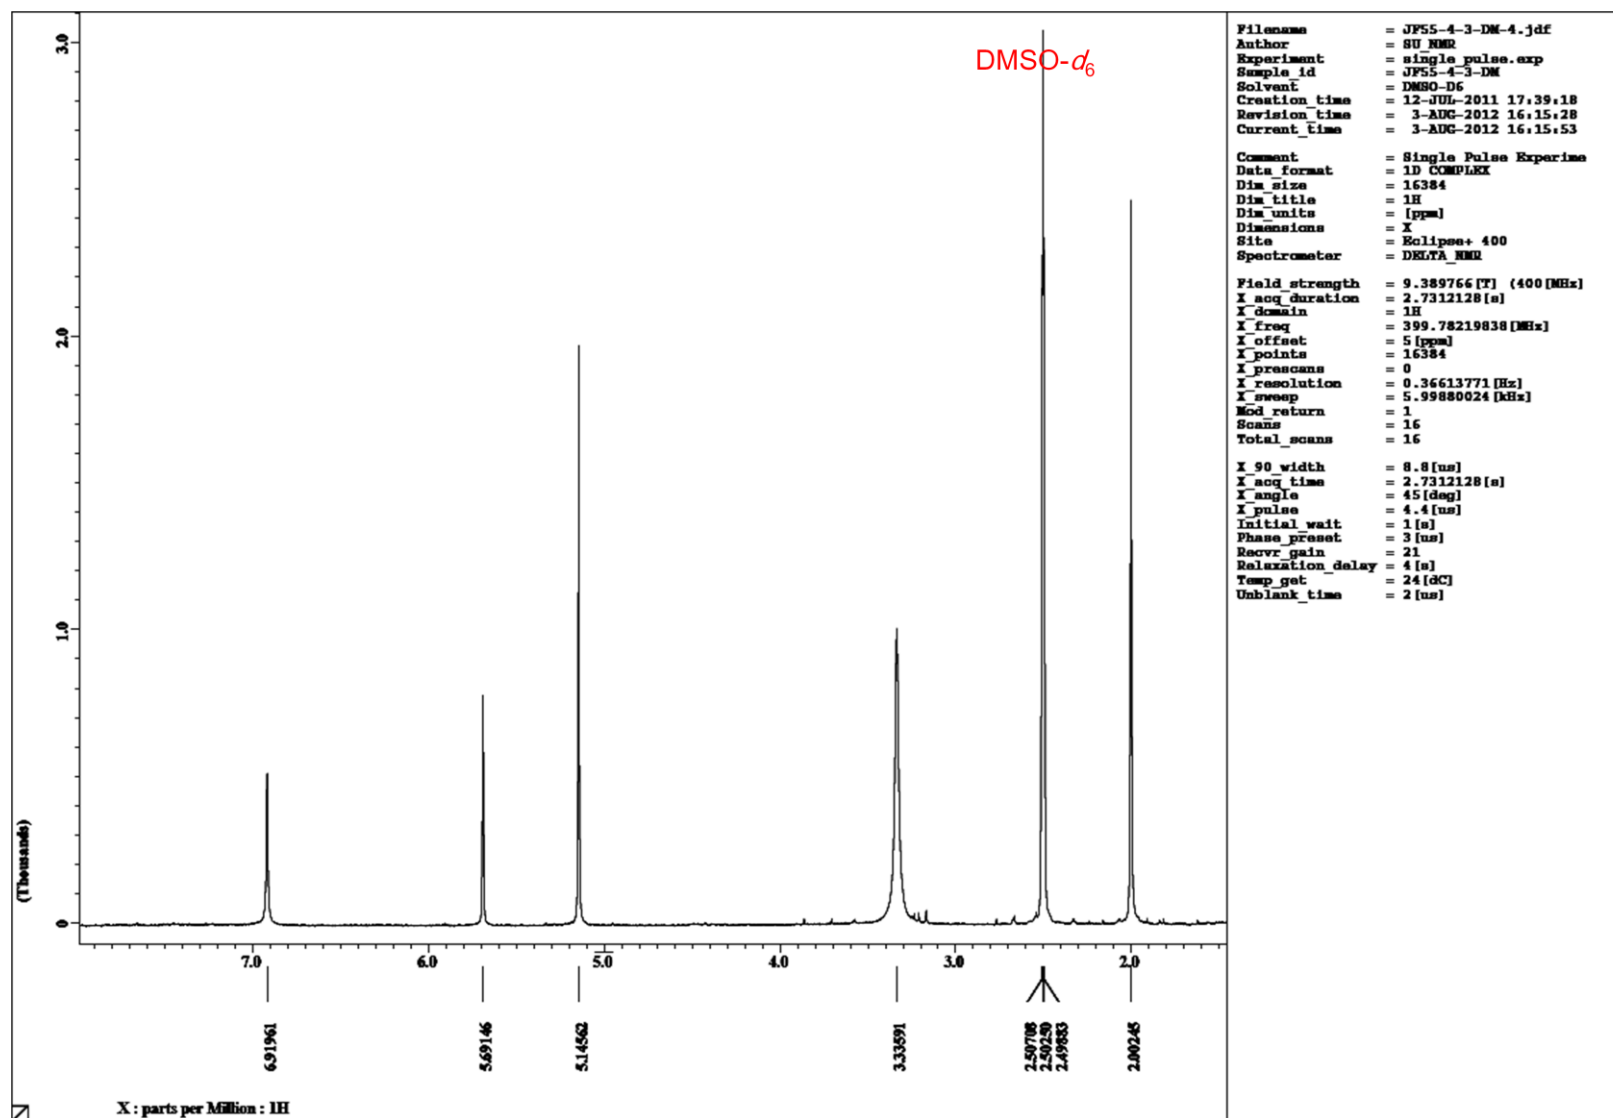

Figure S8.  $^{13}\text{C}$  NMR spectrum of anhydrofulvic acid (2) in  $\text{DMSO-}d_6$ .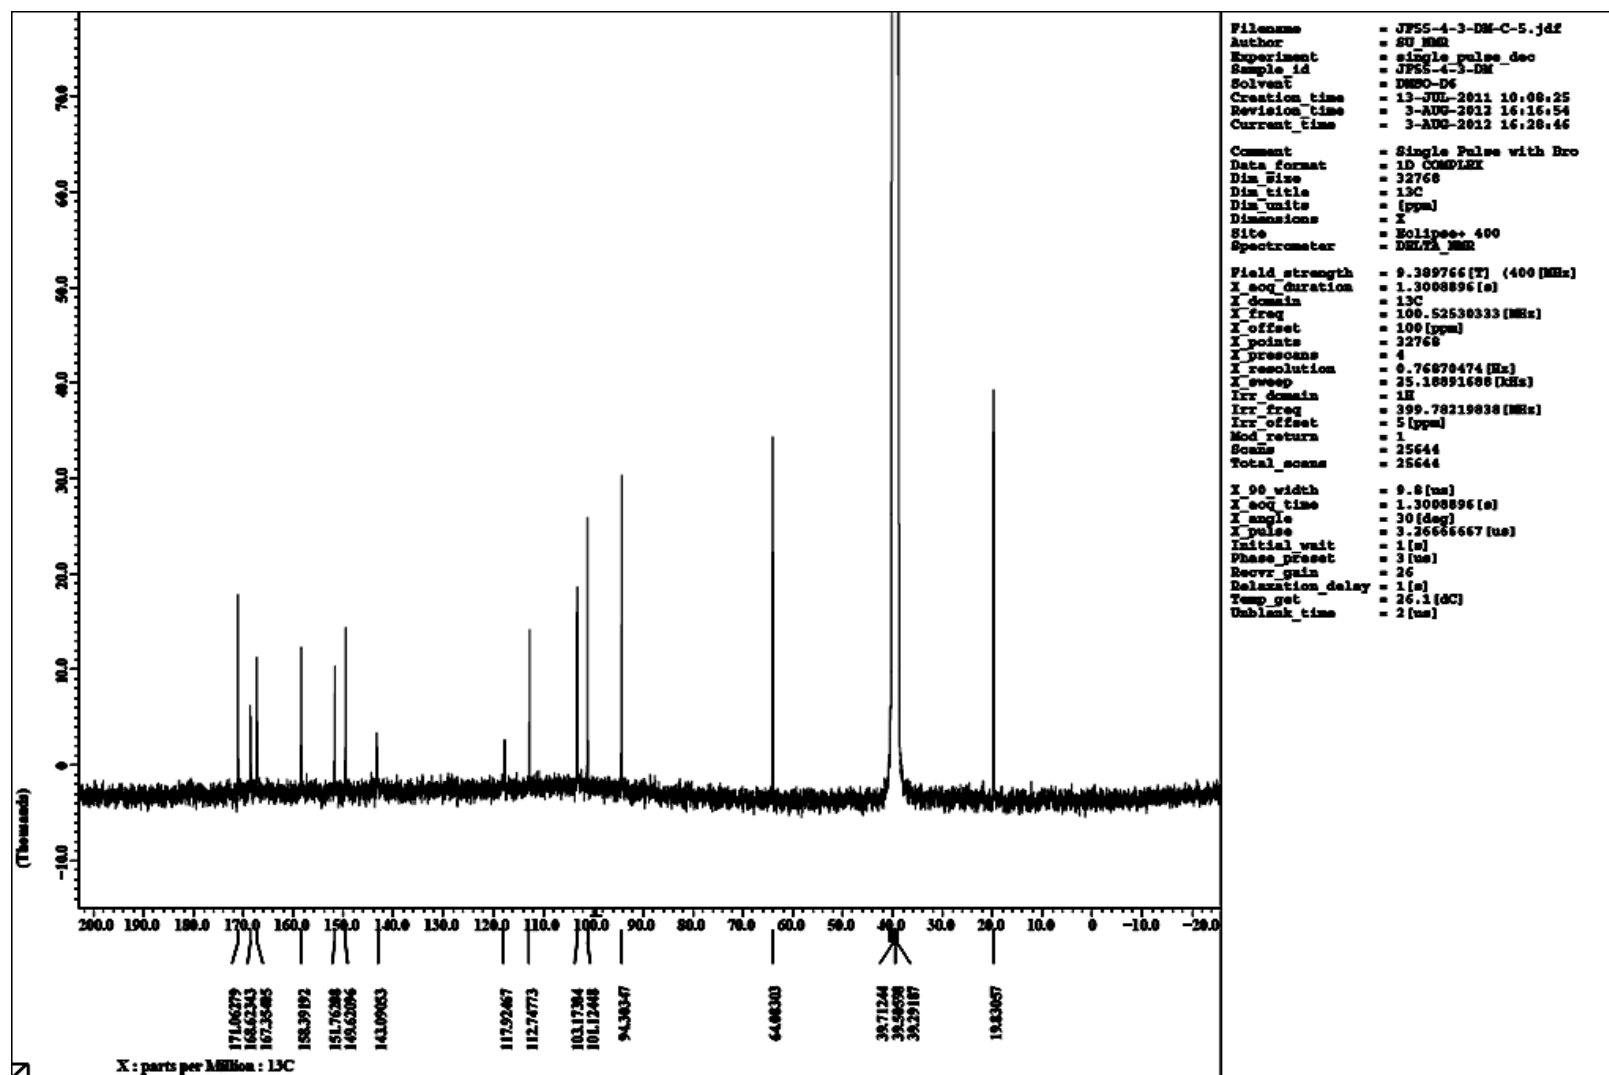



Figure S9.  $^1\text{H}$  NMR spectrum of citromyctin (3) in  $\text{DMSO}-d_6$ .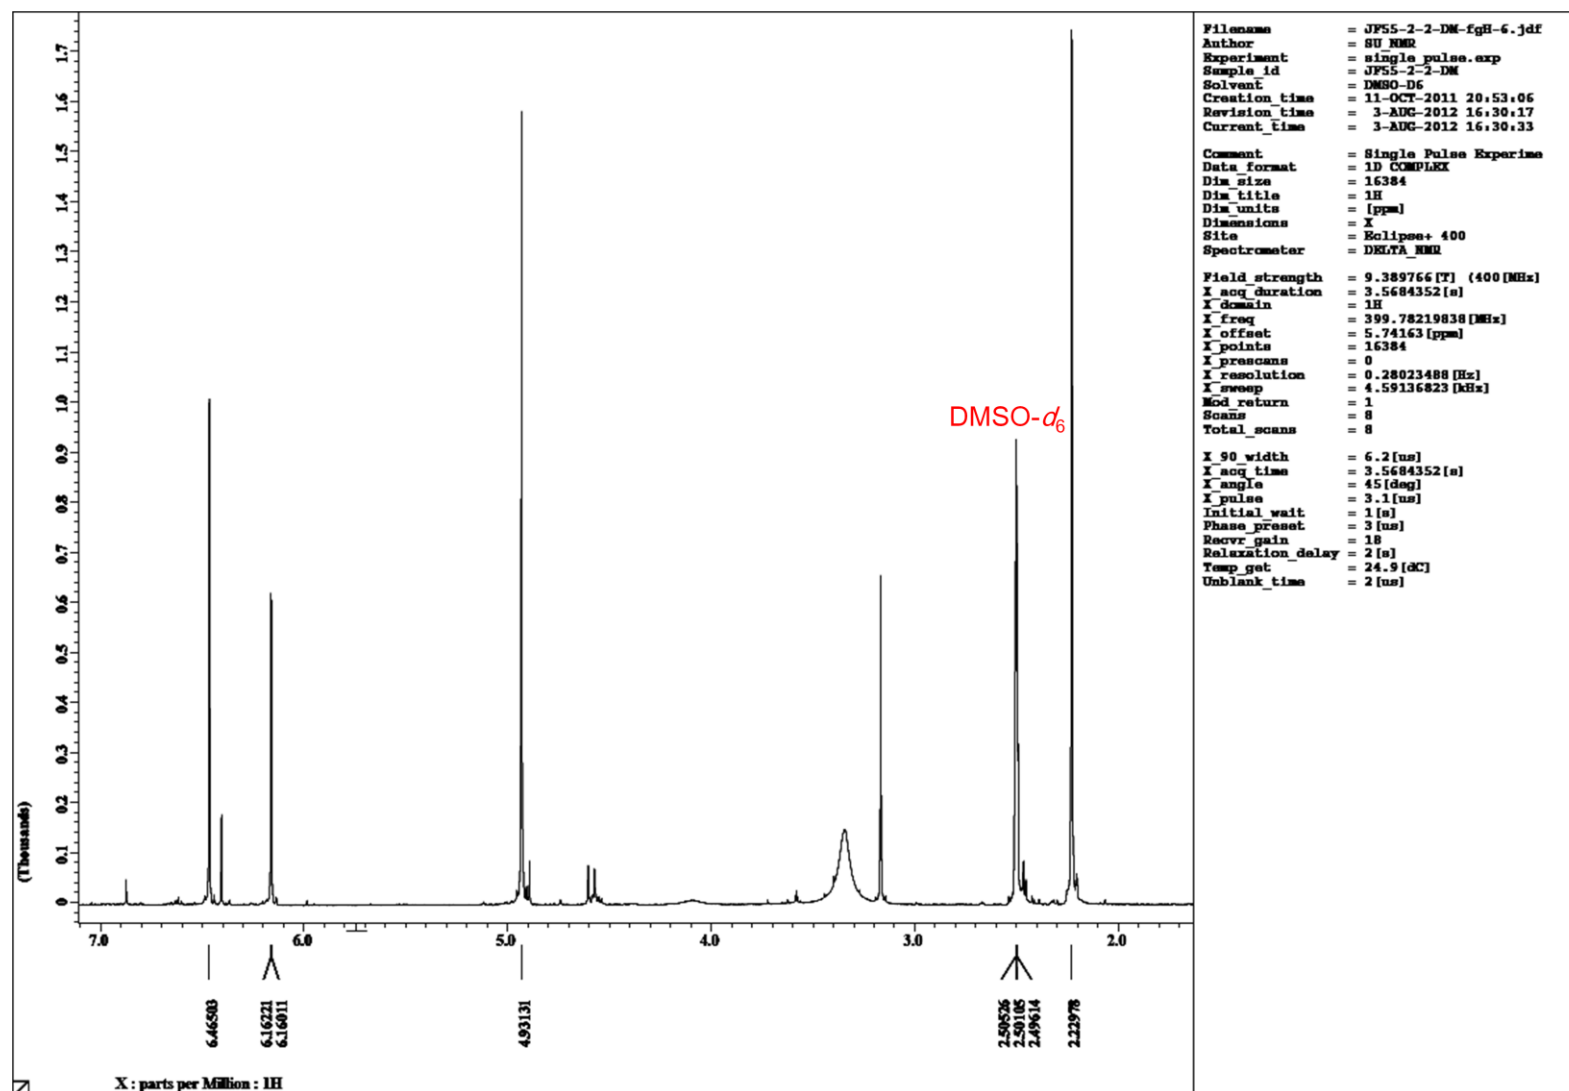

Figure S10.  $^{13}\text{C}$  NMR spectrum of citromyctin (3) in  $\text{DMSO-}d_6$ .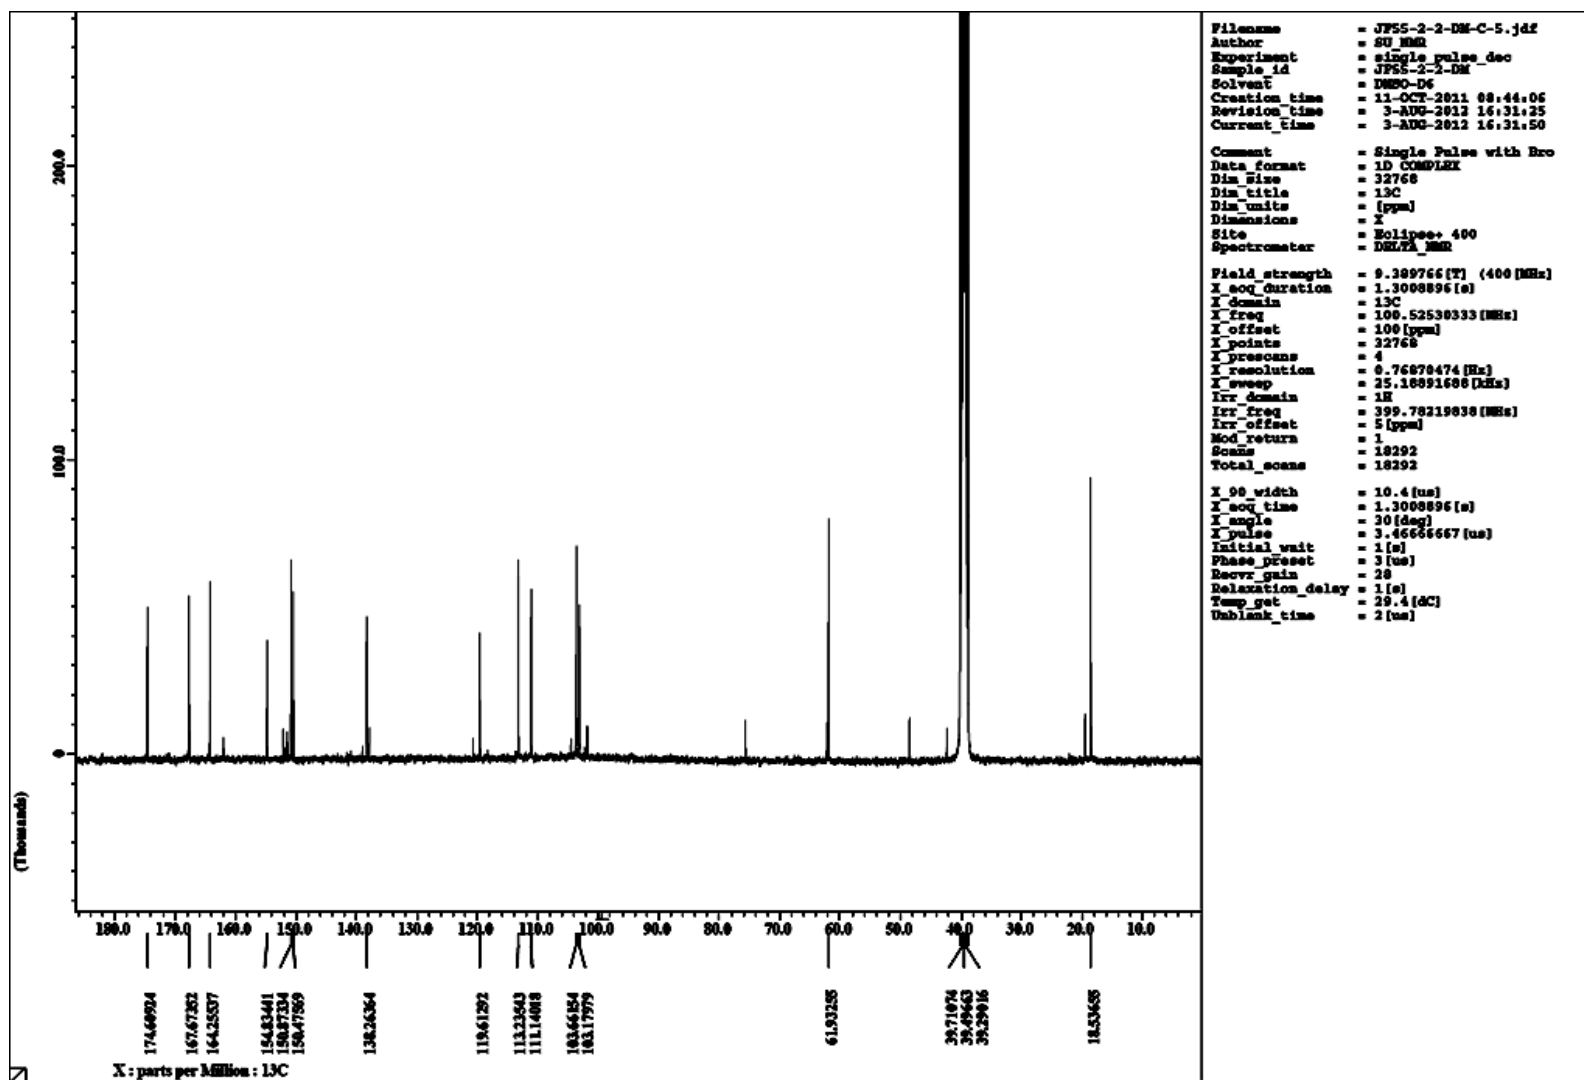

Supplement: s1 [file s1]
