# Supplementary material for: PTP1B Inhibitory and Anti-Inflammatory Effects of Secondary Metabolites Isolated from the Marine-Derived Fungus Penicillium sp. JF-55
Source: MDPI journal article supplement (doi:10.3390/md11041409), 2013-04-23
Supplement: s2 [file s2]

marinedrugs-11-01409-s001.mol
  corina  04151405393D 1   1.00000     0.00000 
CORINA 3.49 0023  12.04.2013
 18 19  0  0  0  0  0  0  0  0999 V2000
    0.0239    1.3704    0.5983 C   0  0  0  0  0  0  0  0  0  0  0  0
    0.0438   -0.0134    0.5861 C   0  0  0  0  0  0  0  0  0  0  0  0
    1.2412   -0.6944    0.4517 C   0  0  0  0  0  0  0  0  0  0  0  0
    2.4247    0.0024    0.3287 C   0  0  0  0  0  0  0  0  0  0  0  0
    2.4130    1.4007    0.3401 C   0  0  0  0  0  0  0  0  0  0  0  0
    1.1990    2.0815    0.4764 C   0  0  0  0  0  0  0  0  0  0  0  0
    3.6566    3.5006    0.2214 C   0  0  0  0  0  0  0  0  0  0  0  0
    3.6719    2.1522    0.2099 C   0  0  0  0  0  0  0  0  0  0  0  0
    6.0714    3.5810   -0.0383 O   0  0  0  0  0  0  0  0  0  0  0  0
    4.9079    4.2475    0.0919 C   0  0  0  0  0  0  0  0  0  0  0  0
    7.2401    4.2352   -0.1600 C   0  0  0  0  0  0  0  0  0  0  0  0
    7.2736    5.6328   -0.1539 C   0  0  0  0  0  0  0  0  0  0  0  0
    6.0875    6.3389   -0.0210 C   0  0  0  0  0  0  0  0  0  0  0  0
    4.8838    5.6245    0.1041 C   0  0  0  0  0  0  0  0  0  0  0  0
    8.2782    3.6047   -0.2760 O   0  0  0  0  0  0  0  0  0  0  0  0
    8.5843    6.3640   -0.2899 C   0  0  0  0  0  0  0  0  0  0  0  0
    6.0892    7.6935   -0.0118 O   0  0  0  0  0  0  0  0  0  0  0  0
    5.4434    8.3505   -1.1042 C   0  0  0  0  0  0  0  0  0  0  0  0
  1  2  1  0      
  2  3  2  0      
  3  4  1  0      
  4  5  2  0      
  5  6  1  0      
  6  1  2  0      
  7  8  2  0      
  8  5  1  0      
  9 10  1  0      
 10  7  1  0      
  9 11  1  0      
 11 12  1  0      
 12 13  2  0      
 13 14  1  0      
 14 10  2  0      
 11 15  2  0      
 12 16  1  0      
 13 17  1  0      
 17 18  1  0      
M  STY  1   1 SUP
M  SLB  1   1   1
M  SAL   1  2  17  18
M  SBL   1  1  18
M  SMT   1 OCH3
M  SBV   1 18   -7.8294    4.8469
M  END
$$$$
