# Supplementary material for: PTP1B Inhibitory and Anti-Inflammatory Effects of Secondary Metabolites Isolated from the Marine-Derived Fungus Penicillium sp. JF-55
Source: MDPI journal article supplement (doi:10.3390/md11041409), 2013-04-23
Supplement: s3 [file s3]

marinedrugs-11-01409-s001.mol
  ChemDraw03101421142D

 18 19  0  0  0  0  0  0  0  0999 V2000
   -2.8991   -0.5156    0.0000 C   0  0  0  0  0  0  0  0  0  0  0  0
   -2.8991   -1.3406    0.0000 C   0  0  0  0  0  0  0  0  0  0  0  0
   -2.1846   -1.7531    0.0000 C   0  0  0  0  0  0  0  0  0  0  0  0
   -1.4702   -1.3406    0.0000 C   0  0  0  0  0  0  0  0  0  0  0  0
   -1.4702   -0.5156    0.0000 C   0  0  0  0  0  0  0  0  0  0  0  0
   -2.1846   -0.1031    0.0000 C   0  0  0  0  0  0  0  0  0  0  0  0
   -0.0412   -0.5156    0.0000 C   0  0  0  0  0  0  0  0  0  0  0  0
   -0.7557   -0.1031    0.0000 C   0  0  0  0  0  0  0  0  0  0  0  0
    1.3877   -0.5156    0.0000 O   0  0  0  0  0  0  0  0  0  0  0  0
    0.6733   -0.1031    0.0000 C   0  0  0  0  0  0  0  0  0  0  0  0
    2.1022   -0.1031    0.0000 C   0  0  0  0  0  0  0  0  0  0  0  0
    2.1022    0.7219    0.0000 C   0  0  0  0  0  0  0  0  0  0  0  0
    1.3877    1.1344    0.0000 C   0  0  0  0  0  0  0  0  0  0  0  0
    0.6733    0.7219    0.0000 C   0  0  0  0  0  0  0  0  0  0  0  0
    2.8167   -0.5156    0.0000 O   0  0  0  0  0  0  0  0  0  0  0  0
    2.8991    0.9354    0.0000 C   0  0  0  0  0  0  0  0  0  0  0  0
    1.7449    1.7531    0.0000 O   0  0  0  0  0  0  0  0  0  0  0  0
    2.4593    1.3406    0.0000 C   0  0  0  0  0  0  0  0  0  0  0  0
  1  2  1  0      
  2  3  2  0      
  3  4  1  0      
  4  5  2  0      
  5  6  1  0      
  6  1  2  0      
  7  8  2  0      
  8  5  1  0      
  9 10  1  0      
 10  7  1  0      
  9 11  1  0      
 11 12  1  0      
 12 13  2  0      
 13 14  1  0      
 14 10  2  0      
 11 15  2  0      
 12 16  1  0      
 13 17  1  0      
 17 18  1  0      
M  STY  1   1 SUP
M  SLB  1   1   1
M  SAL   1  2  17  18
M  SBL   1  1  18
M  SMT   1 OCH3
M  SBV   1 18   -7.8294    4.8469
M  END
