# Supplementary material for: PTP1B Inhibitory and Anti-Inflammatory Effects of Secondary Metabolites Isolated from the Marine-Derived Fungus Penicillium sp. JF-55
Source: MDPI journal article supplement (doi:10.3390/md11041409), 2013-04-23
Supplement: s4 [file s4]

marinedrugs-11-01409-s002.mol
  corina  04151405483D 1   1.00000     0.00000 
CORINA 3.49 0023  12.04.2013
 21 23  0  0  0  0  0  0  0  0999 V2000
   -0.0169    1.3935    0.0097 C   0  0  0  0  0  0  0  0  0  0  0  0
    0.0021   -0.0041    0.0020 C   0  0  0  0  0  0  0  0  0  0  0  0
    1.1999   -0.6921   -0.0130 C   0  0  0  0  0  0  0  0  0  0  0  0
    2.4085   -0.0012   -0.0216 C   0  0  0  0  0  0  0  0  0  0  0  0
    2.4037    1.3982   -0.0137 C   0  0  0  0  0  0  0  0  0  0  0  0
    1.1846    2.1044    0.0020 C   0  0  0  0  0  0  0  0  0  0  0  0
    3.5800   -0.6735   -0.0395 O   0  0  0  0  0  0  0  0  0  0  0  0
    4.7690   -0.0493   -0.0175 C   0  0  0  0  0  0  0  0  0  0  0  0
    4.8632    1.3304   -0.0265 C   0  0  0  0  0  0  0  0  0  0  0  0
    3.6961    2.1108   -0.0215 C   0  0  0  0  0  0  0  0  0  0  0  0
    5.9747   -0.8033    0.0017 C   0  0  0  0  0  0  0  0  0  0  0  0
    7.1346   -0.1900    0.2897 C   0  0  0  0  0  0  0  0  0  0  0  0
    7.1660    1.1242    0.5916 O   0  0  0  0  0  0  0  0  0  0  0  0
    6.2229    1.9783   -0.0608 C   0  0  0  0  0  0  0  0  0  0  0  0
    1.1778    3.5774    0.0098 C   0  0  0  0  0  0  0  0  0  0  0  0
    1.1863    4.2451    1.1805 O   0  0  0  0  0  0  0  0  0  0  0  0
   -1.2003    2.0578    0.0189 O   0  0  0  0  0  0  0  0  0  0  0  0
    3.7483    3.3309   -0.0239 O   0  0  0  0  0  0  0  0  0  0  0  0
    1.1647    4.1905   -1.0393 O   0  0  0  0  0  0  0  0  0  0  0  0
    8.4175   -0.9806    0.2758 C   0  0  0  0  0  0  0  0  0  0  0  0
   -1.1689   -0.6926    0.0099 O   0  0  0  0  0  0  0  0  0  0  0  0
  1  2  2  0      
  2  3  1  0      
  3  4  2  0      
  4  5  1  0      
  5  6  2  0      
  6  1  1  0      
  4  7  1  0      
  7  8  1  0      
  8  9  2  0      
  9 10  1  0      
 10  5  1  0      
  8 11  1  0      
 11 12  2  0      
 12 13  1  0      
 13 14  1  0      
 14  9  1  0      
  6 15  1  0      
 15 16  1  0      
 17  1  1  0      
 10 18  2  0      
 19 15  2  0      
 12 20  1  0      
  2 21  1  0      
M  END
$$$$
