# Supplementary material for: PTP1B Inhibitory and Anti-Inflammatory Effects of Secondary Metabolites Isolated from the Marine-Derived Fungus Penicillium sp. JF-55
Source: MDPI journal article supplement (doi:10.3390/md11041409), 2013-04-23
Supplement: s5 [file s5]

marinedrugs-11-01409-s002.mol
  ChemDraw03101421152D

 21 23  0  0  0  0  0  0  0  0999 V2000
   -2.1434   -0.2062    0.0000 C   0  0  0  0  0  0  0  0  0  0  0  0
   -2.1434   -1.0313    0.0000 C   0  0  0  0  0  0  0  0  0  0  0  0
   -1.4289   -1.4438    0.0000 C   0  0  0  0  0  0  0  0  0  0  0  0
   -0.7145   -1.0313    0.0000 C   0  0  0  0  0  0  0  0  0  0  0  0
   -0.7145   -0.2062    0.0000 C   0  0  0  0  0  0  0  0  0  0  0  0
   -1.4289    0.2062    0.0000 C   0  0  0  0  0  0  0  0  0  0  0  0
    0.0000   -1.4438    0.0000 O   0  0  0  0  0  0  0  0  0  0  0  0
    0.7145   -1.0313    0.0000 C   0  0  0  0  0  0  0  0  0  0  0  0
    0.7145   -0.2062    0.0000 C   0  0  0  0  0  0  0  0  0  0  0  0
    0.0000    0.2062    0.0000 C   0  0  0  0  0  0  0  0  0  0  0  0
    1.4289   -1.4438    0.0000 C   0  0  0  0  0  0  0  0  0  0  0  0
    2.1434   -1.0313    0.0000 C   0  0  0  0  0  0  0  0  0  0  0  0
    2.1434   -0.2062    0.0000 O   0  0  0  0  0  0  0  0  0  0  0  0
    1.4289    0.2062    0.0000 C   0  0  0  0  0  0  0  0  0  0  0  0
   -1.4289    1.0313    0.0000 C   0  0  0  0  0  0  0  0  0  0  0  0
   -2.1434    1.4438    0.0000 O   0  0  0  0  0  0  0  0  0  0  0  0
   -2.8579    0.2062    0.0000 O   0  0  0  0  0  0  0  0  0  0  0  0
    0.0000    1.0313    0.0000 O   0  0  0  0  0  0  0  0  0  0  0  0
   -0.7145    1.4438    0.0000 O   0  0  0  0  0  0  0  0  0  0  0  0
    2.8579   -1.4438    0.0000 C   0  0  0  0  0  0  0  0  0  0  0  0
   -2.8579   -1.4438    0.0000 O   0  0  0  0  0  0  0  0  0  0  0  0
  1  2  2  0      
  2  3  1  0      
  3  4  2  0      
  4  5  1  0      
  5  6  2  0      
  6  1  1  0      
  4  7  1  0      
  7  8  1  0      
  8  9  2  0      
  9 10  1  0      
 10  5  1  0      
  8 11  1  0      
 11 12  2  0      
 12 13  1  0      
 13 14  1  0      
 14  9  1  0      
  6 15  1  0      
 15 16  1  0      
 17  1  1  0      
 10 18  2  0      
 19 15  2  0      
 12 20  1  0      
  2 21  1  0      
M  END
