# Supplementary material for: PTP1B Inhibitory and Anti-Inflammatory Effects of Secondary Metabolites Isolated from the Marine-Derived Fungus Penicillium sp. JF-55
Source: MDPI journal article supplement (doi:10.3390/md11041409), 2013-04-23
Supplement: s6 [file s6]

marinedrugs-11-01409-s003.mol
  corina  04151405493D 1   1.00000     0.00000 
CORINA 3.49 0023  12.04.2013
 21 23  0  0  0  0  0  0  0  0999 V2000
   -0.0168    1.3909    0.0097 C   0  0  0  0  0  0  0  0  0  0  0  0
    0.0021   -0.0041    0.0020 C   0  0  0  0  0  0  0  0  0  0  0  0
    1.2039   -0.6927   -0.0126 C   0  0  0  0  0  0  0  0  0  0  0  0
    2.4055   -0.0021   -0.0197 C   0  0  0  0  0  0  0  0  0  0  0  0
    2.4035    1.3982   -0.0139 C   0  0  0  0  0  0  0  0  0  0  0  0
    1.1857    2.1038    0.0020 C   0  0  0  0  0  0  0  0  0  0  0  0
    3.5900   -0.6645   -0.0285 O   0  0  0  0  0  0  0  0  0  0  0  0
    4.6762   -0.0707   -0.7411 C   0  0  0  0  0  0  0  0  0  0  0  0
    4.8083    1.3820   -0.3747 C   0  0  0  0  0  0  0  0  0  0  0  0
    3.6990    2.1022   -0.0270 C   0  0  0  0  0  0  0  0  0  0  0  0
    6.0658    2.0206   -0.3837 C   0  0  0  0  0  0  0  0  0  0  0  0
    6.1065    3.3985   -0.0313 C   0  0  0  0  0  0  0  0  0  0  0  0
    4.9609    4.0246    0.2899 C   0  0  0  0  0  0  0  0  0  0  0  0
    3.7805    3.3994    0.2926 O   0  0  0  0  0  0  0  0  0  0  0  0
    1.1649    4.1899   -1.0390 O   0  0  0  0  0  0  0  0  0  0  0  0
    1.1784    3.5766    0.0101 C   0  0  0  0  0  0  0  0  0  0  0  0
    1.1867    4.2442    1.1808 O   0  0  0  0  0  0  0  0  0  0  0  0
   -1.2010    2.0549    0.0189 O   0  0  0  0  0  0  0  0  0  0  0  0
   -1.1687   -0.6933    0.0094 O   0  0  0  0  0  0  0  0  0  0  0  0
    5.0104    5.4844    0.6608 C   0  0  0  0  0  0  0  0  0  0  0  0
    7.0829    1.4128   -0.6827 O   0  0  0  0  0  0  0  0  0  0  0  0
  1  2  2  0      
  2  3  1  0      
  3  4  2  0      
  4  5  1  0      
  5  6  2  0      
  6  1  1  0      
  4  7  1  0      
  7  8  1  0      
  8  9  1  0      
  9 10  2  0      
 10  5  1  0      
  9 11  1  0      
 11 12  1  0      
 12 13  2  0      
 13 14  1  0      
 14 10  1  0      
 15 16  2  0      
 16  6  1  0      
 16 17  1  0      
 18  1  1  0      
  2 19  1  0      
 13 20  1  0      
 11 21  2  0      
M  END
$$$$
