# Supplementary material for: PTP1B Inhibitory and Anti-Inflammatory Effects of Secondary Metabolites Isolated from the Marine-Derived Fungus Penicillium sp. JF-55
Source: MDPI journal article supplement (doi:10.3390/md11041409), 2013-04-23
Supplement: s7 [file s7]

marinedrugs-11-01409-s003.mol
  ChemDraw03101421152D

 21 23  0  0  0  0  0  0  0  0999 V2000
   -1.7862   -0.6188    0.0000 C   0  0  0  0  0  0  0  0  0  0  0  0
   -1.7862   -1.4438    0.0000 C   0  0  0  0  0  0  0  0  0  0  0  0
   -1.0717   -1.8563    0.0000 C   0  0  0  0  0  0  0  0  0  0  0  0
   -0.3572   -1.4438    0.0000 C   0  0  0  0  0  0  0  0  0  0  0  0
   -0.3572   -0.6188    0.0000 C   0  0  0  0  0  0  0  0  0  0  0  0
   -1.0717   -0.2062    0.0000 C   0  0  0  0  0  0  0  0  0  0  0  0
    0.3572   -1.8563    0.0000 O   0  0  0  0  0  0  0  0  0  0  0  0
    1.0717   -1.4438    0.0000 C   0  0  0  0  0  0  0  0  0  0  0  0
    1.0717   -0.6188    0.0000 C   0  0  0  0  0  0  0  0  0  0  0  0
    0.3572   -0.2062    0.0000 C   0  0  0  0  0  0  0  0  0  0  0  0
    1.7862   -0.2062    0.0000 C   0  0  0  0  0  0  0  0  0  0  0  0
    1.7862    0.6188    0.0000 C   0  0  0  0  0  0  0  0  0  0  0  0
    1.0717    1.0313    0.0000 C   0  0  0  0  0  0  0  0  0  0  0  0
    0.3572    0.6188    0.0000 O   0  0  0  0  0  0  0  0  0  0  0  0
   -0.3572    1.0313    0.0000 O   0  0  0  0  0  0  0  0  0  0  0  0
   -1.0717    0.6188    0.0000 C   0  0  0  0  0  0  0  0  0  0  0  0
   -1.7862    1.0313    0.0000 O   0  0  0  0  0  0  0  0  0  0  0  0
   -2.5006   -0.2062    0.0000 O   0  0  0  0  0  0  0  0  0  0  0  0
   -2.5006   -1.8563    0.0000 O   0  0  0  0  0  0  0  0  0  0  0  0
    1.0717    1.8563    0.0000 C   0  0  0  0  0  0  0  0  0  0  0  0
    2.5006   -0.6188    0.0000 O   0  0  0  0  0  0  0  0  0  0  0  0
  1  2  2  0      
  2  3  1  0      
  3  4  2  0      
  4  5  1  0      
  5  6  2  0      
  6  1  1  0      
  4  7  1  0      
  7  8  1  0      
  8  9  1  0      
  9 10  2  0      
 10  5  1  0      
  9 11  1  0      
 11 12  1  0      
 12 13  2  0      
 13 14  1  0      
 14 10  1  0      
 15 16  2  0      
 16  6  1  0      
 16 17  1  0      
 18  1  1  0      
  2 19  1  0      
 13 20  1  0      
 11 21  2  0      
M  END
